# Supplementary material for: Genetic Structure of Racing Pigeons (Columba livia) Kept in Poland Based on Microsatellite Markers
Source: MDPI journal article supplement (doi:10.3390/genes13071175), 2022-06-29
Supplement: s1 [file s1]

Article

# Genetic Structure of Racing Pigeons (*Columba livia*) Kept in Poland Based on Microsatellite Markers

Angelika Podbielska \* and Anna Radko

Department of Animal Molecular Biology, National Research Institute of Animal Production, Krakowska 1, 32-083 Balice, Poland; anna.radko@iz.edu.pl

\* Correspondence: angelika.podbielska@iz.edu.pl

## Supplementary Materials

**Table S1.** The Evanno table output from STRUCTURE HARVESTER on a dataset containing 519 individuals.

| K  | Reps | Mean LnP(K)   | Stdev LnP(K) | Ln'(K)     | Ln''(K)    | Delta K   |
|----|------|---------------|--------------|------------|------------|-----------|
| 1  | 10   | -24287.320000 | 0.122927     | —          | —          | —         |
| 2  | 10   | -23826.230000 | 6.429109     | 461.090000 | 6.970000   | 1.084132  |
| 3  | 10   | -23372.110000 | 20.831037    | 454.120000 | 59.920000  | 2.876477  |
| 4  | 10   | -22977.910000 | 13.627868    | 394.200000 | 179.700000 | 13.186215 |
| 5  | 10   | -22763.410000 | 72.231594    | 214.500000 | 115.200000 | 1.594870  |
| 6  | 10   | -22433.710000 | 27.271860    | 329.700000 | 94.390000  | 3.461077  |
| 7  | 10   | -22198.400000 | 22.630756    | 235.310000 | 44.120000  | 1.949559  |
| 8  | 10   | -22007.210000 | 20.028505    | 191.190000 | 19.550000  | 0.976109  |
| 9  | 10   | -21835.570000 | 46.606367    | 171.640000 | 54.640000  | 1.172372  |
| 10 | 10   | -21718.570000 | 33.777575    | 117.000000 | —          | —         |

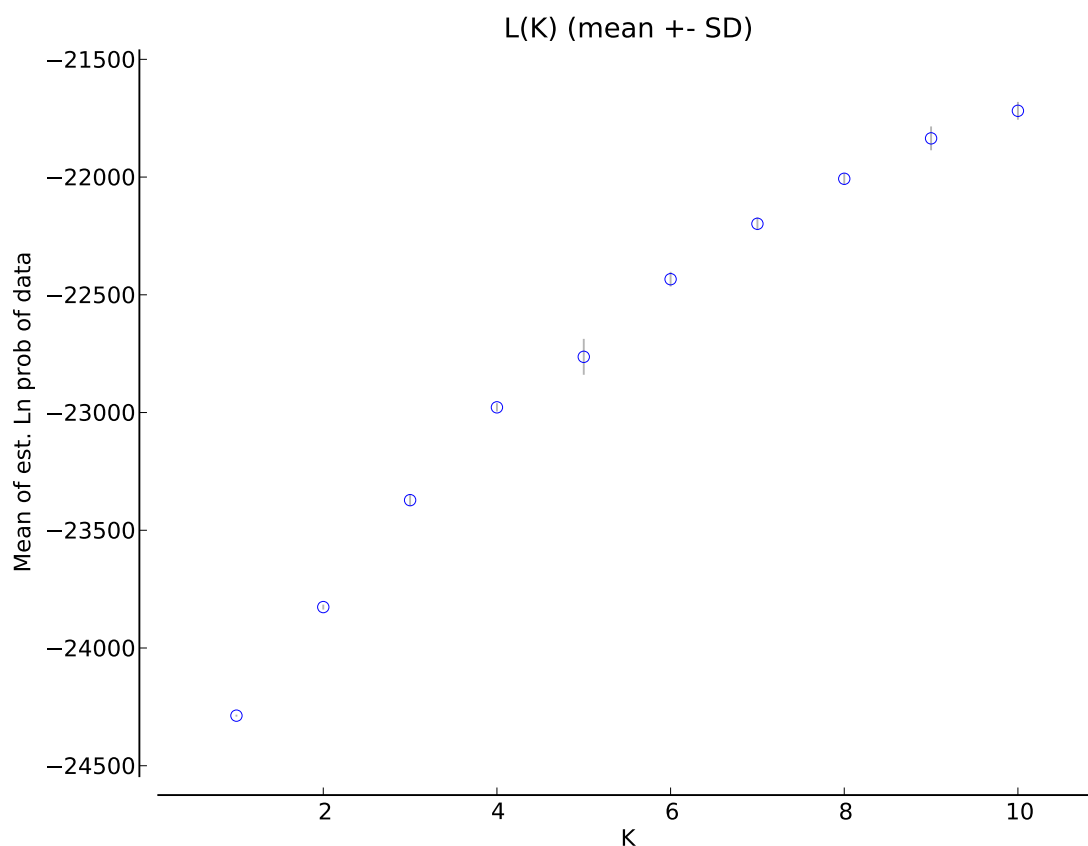

**Figure S1.** Plot of mean likelihood  $L(K)$  and variance per  $K$  value from STRUCTURE HARVESTER on a dataset containing 519 individuals.

**Table S2.** The Evanno table output from STRUCTURE HARVESTER on a dataset containing 519 individuals divided into five populations by country of origin.

| K  | Reps | Mean LnP(K)   | Stdev LnP(K) | Ln'(K)     | Ln''(K)    | Delta K   |
|----|------|---------------|--------------|------------|------------|-----------|
| 1  | 10   | -24287.400000 | 0.124722     | —          | —          | —         |
| 2  | 10   | -23825.260000 | 5.637415     | 462.140000 | 23.110000  | 4.099397  |
| 3  | 10   | -23386.230000 | 52.843523    | 439.030000 | 25.060000  | 0.474230  |
| 4  | 10   | -22972.260000 | 5.232633     | 413.970000 | 186.300000 | 35.603493 |
| 5  | 10   | -22744.590000 | 52.633142    | 227.670000 | 65.330000  | 1.241233  |
| 6  | 10   | -22451.590000 | 56.082250    | 293.000000 | 33.350000  | 0.594662  |
| 7  | 10   | -22191.940000 | 11.797665    | 259.650000 | 86.480000  | 7.330264  |
| 8  | 10   | -22018.770000 | 45.539191    | 173.170000 | 8.680000   | 0.190605  |
| 9  | 10   | -21854.280000 | 47.616496    | 164.490000 | 32.730000  | 0.687367  |
| 10 | 10   | -21722.520000 | 52.546356    | 131.760000 | —          | —         |

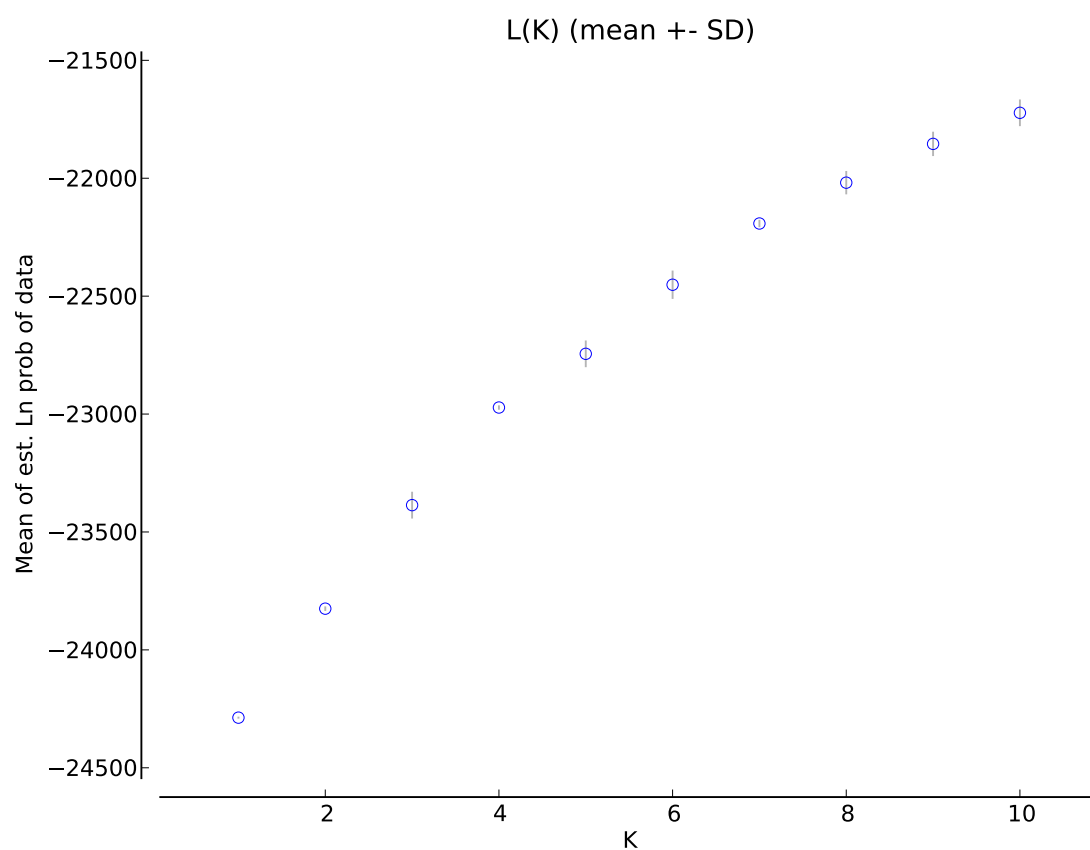

**Figure S2.** Plot of mean likelihood  $L(K)$  and variance per  $K$  value from STRUCTURE HARVESTER on a dataset containing 519 individuals divided into five populations by country of origin.

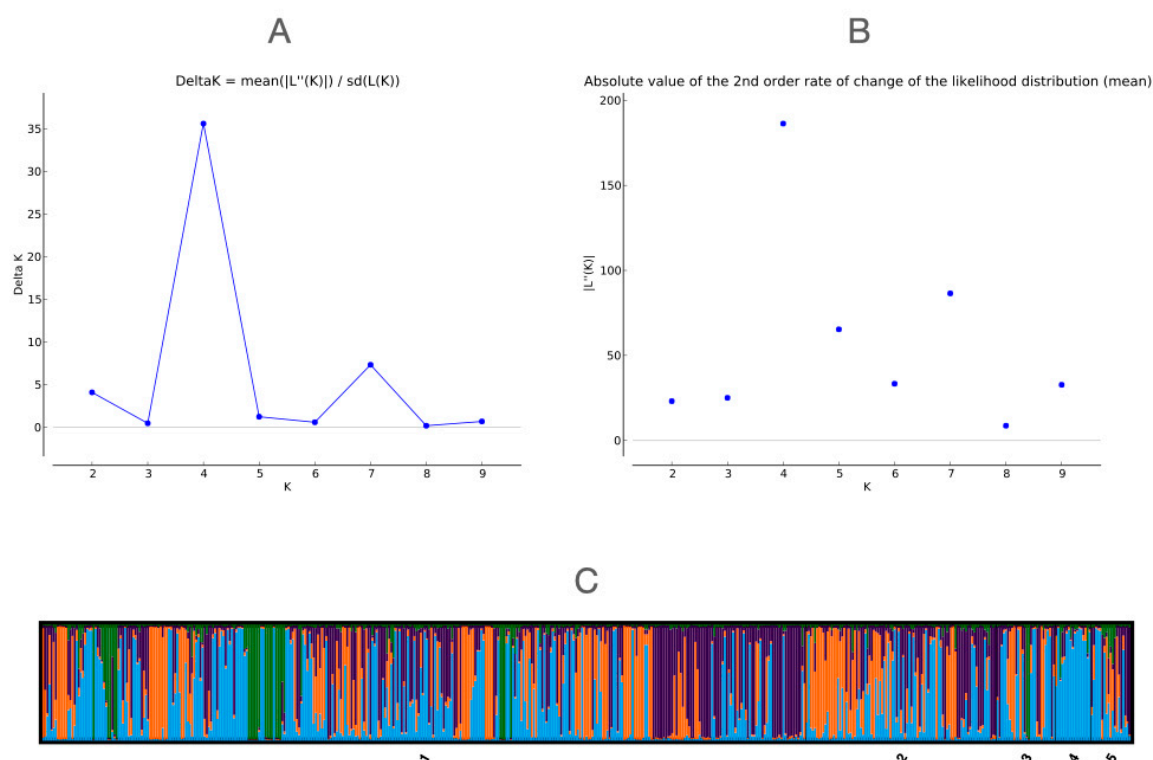

**Figure S3.** (A) Delta K values obtained with STRUCTURE HARVESTER. (B) Rate of change in the likelihood distribution (mean) obtained with STRUCTURE HARVESTER. (C) STRUCTURE software clustering at K=4, where: 1–PL; 2–BE; 3–DV; 4–SK; and 5–NL.

**Table S3.** Pairwise  $F_{ST}$  values, where: 1–PL; 2–BE; 3–DV; 4–SK; and 5–NL.

| 1     | 2     | 3     | 4     | 5     |   |
|-------|-------|-------|-------|-------|---|
| 0,000 |       |       |       |       | 1 |
| 0,003 | 0,000 |       |       |       | 2 |
| 0,006 | 0,007 | 0,000 |       |       | 3 |
| 0,031 | 0,034 | 0,037 | 0,000 |       | 4 |
| 0,010 | 0,013 | 0,014 | 0,036 | 0,000 | 5 |

**Table S4.** Pairwise population  $N_m$  values based on  $F_{ST}$  values, where: 1–PL; 2–BE; 3–DV; 4–SK; and 5–NL.

| 1       | 2      | 3      | 4     | 5     |   |
|---------|--------|--------|-------|-------|---|
| 0.000   |        |        |       |       | 1 |
| 140.825 | 0.000  |        |       |       | 2 |
| 114.017 | 72.601 | 0.000  |       |       | 3 |
| 5.644   | 5.179  | 4.967  | 0.000 |       | 4 |
| 87.262  | 40.269 | 62.816 | 5.907 | 0.000 | 5 |
